# Supplementary material for: Loss of CtIP disturbs homologous recombination repair and sensitizes breast cancer cells to PARP inhibitors
Source: Oncotarget. 2015 Dec 22;7(7):7701–14. doi: 10.18632/oncotarget.6715 (PMC4884948; doi:10.18632/oncotarget.6715)
Supplement: Supplementary file 1 [file oncotarget-07-7701-s001.pdf]

## SUPPLEMENTARY FIGURES

A

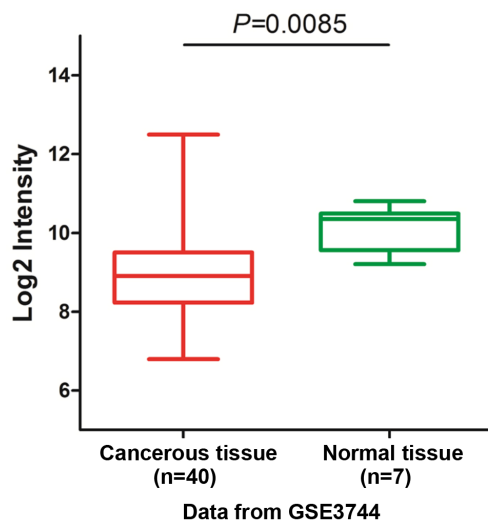

B

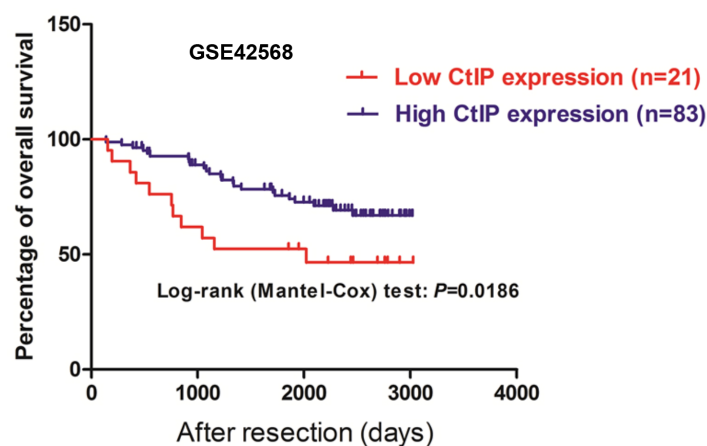

**Supplementary Figure S1: A.** *CtlP* mRNA expression levels are significantly reduced in breast tumors in comparison to normal breast tissues, using a publicly available microarray dataset (GSE3744). *CtlP* expression is measured as log2 (probe intensities). The *P*-values were obtained from Mann-Whitney *U* or Kruskal-Wallis tests. **B.** Kaplan-Meier survival curves comparing disease-free survival between cases with the lowest ( $\leq 20$ th percentile) vs. highest ( $> 20$ th percentile) *CtlP* expression ( $P = 0.0186$ , log-rank test).

(Continued)

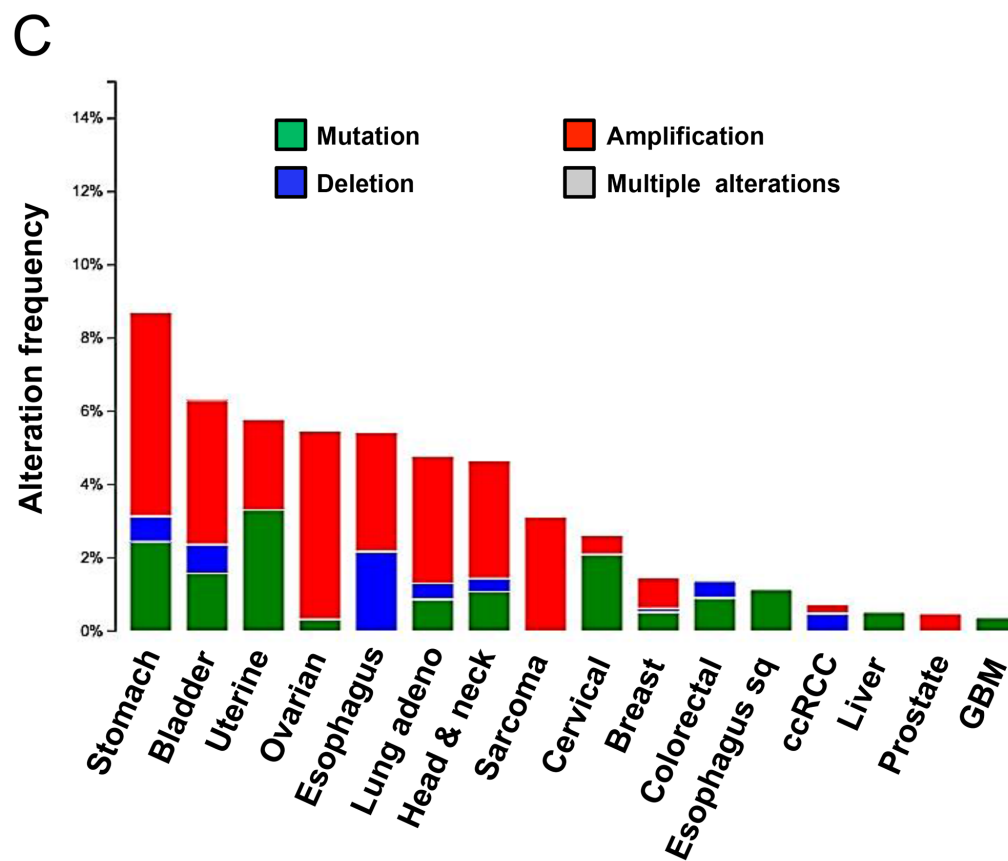

**Supplementary Figure S1 (Continued): C.** Cross-cancer summary of mutations and copy number variations of *CtlP* in several major cancers available on cBioPortal. ccRCC, clear cell renal cell carcinoma; GBM, glioblastoma.

A

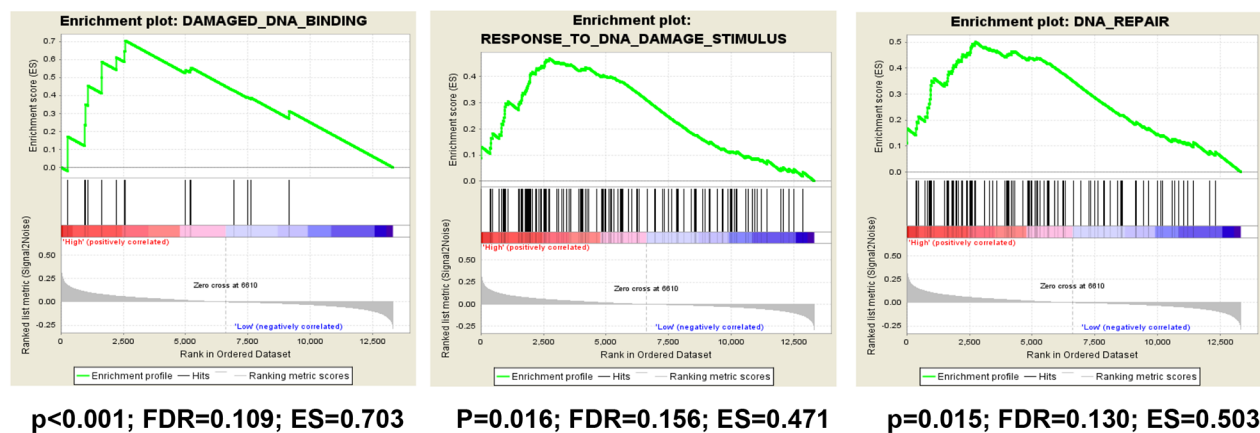

B

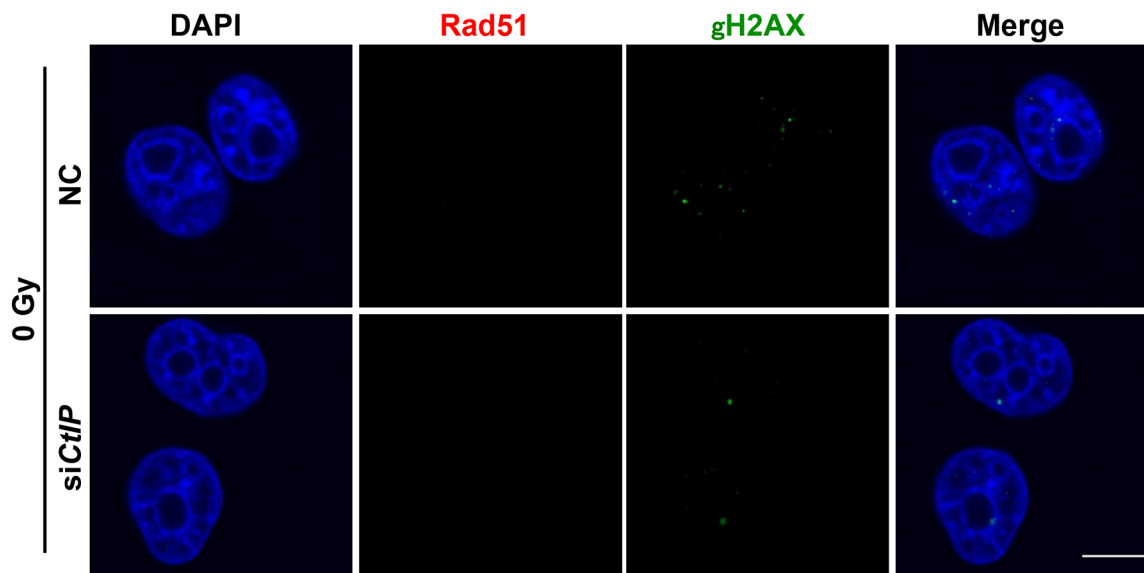

**Supplementary Figure S2: A.** Gene set enrichment analysis (GSEA) plot showed that there was enriched expression of gene sets involved in DNA damage and repair progression. **B.** The images of  $\gamma$ H2AX and Rad51 foci at 0 Gy IR in control and *CtIP*-depleted MCF7 cells. Scale bar, 40  $\mu$ m.

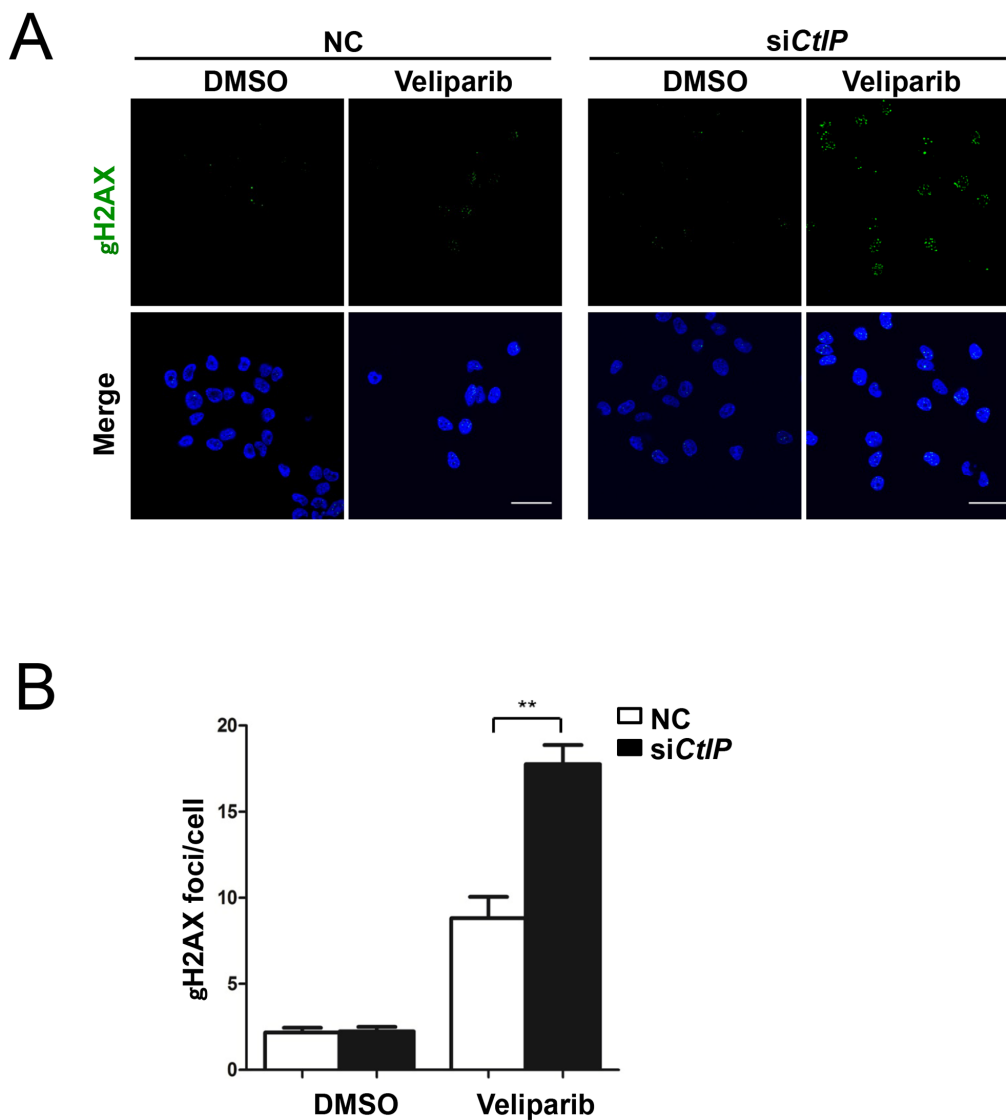

**Supplemental Figure 3:** A. PARP inhibitor causes more DNA damage in *CtIP*-depleted MCF7 cells. Five  $\mu$ M veliparib was added to wild-type MCF7 cells and *CtIP*-depleted MCF7 cells and cultured for 16 hrs. Cells were then fixed and immunostained with  $\gamma$ H2AX antibodies. **B.** Quantification of  $\gamma$ H2AX foci in Supplemental Figure 3A. Numbers of  $\gamma$ H2AX foci were quantified from triplicated experiments (>50 cells at each condition) and were shown as mean values  $\pm$  SEM. Significance was calculated by one-way analysis of variance (ANOVA) (\* for  $P < 0.05$ ; \*\* for  $P < 0.01$ ; where not indicated, the  $P$  value was equal or higher than 0.05).

(Continued)

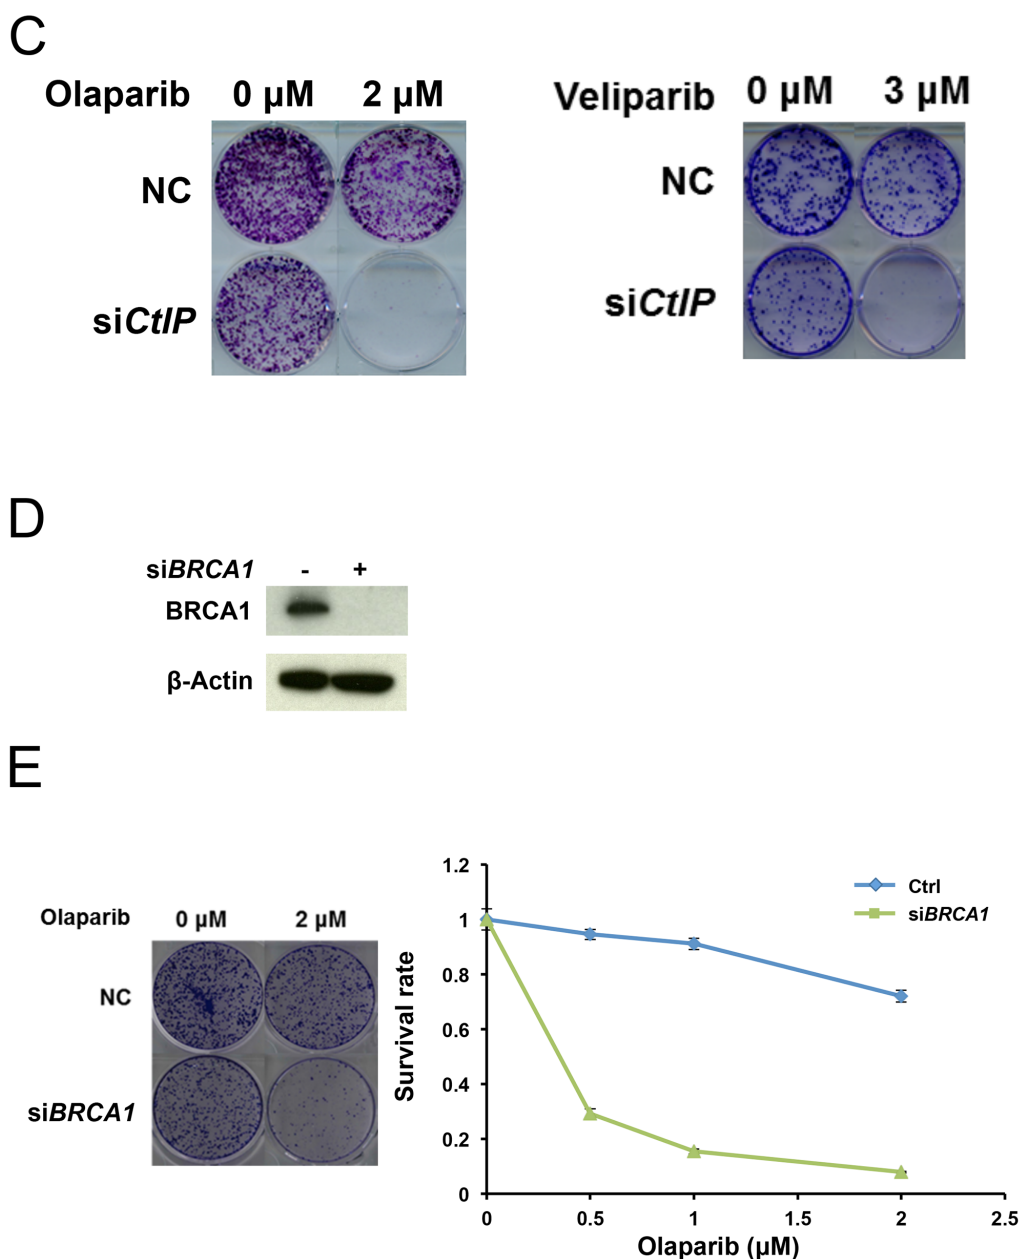

**Supplementary Figure S3 (Continued):** C. Knockdown of *CtIP* reduces colony formation after olaparib and veliparib treatment in MCF7 cells. D. Western blot analysis of BRCA1 in whole cell extracts from MCF7 cells transfected with *BRCA1* or control siRNA (50 nM) for 48 hrs. E. Knockdown of *BRCA1* reduces colony formation after PARP inhibitor treatment in MCF7 cells. The plating efficiency of NC and siBRCA1 was  $95 \pm 2\%$  and  $69 \pm 3\%$ , respectively.
